# Supplementary material for: Cyclin B1 scaffolds MAD1 at the kinetochore corona to activate the mitotic checkpoint
Source: PubMed Central journal article supplement (PMC7298293; doi:10.15252/embj.2019103180), 2020-03-23
Supplement: EMBJ-39-e103180-s001.pdf [file EMBJ-39-e103180-s001.pdf]

## **APPENDIX FOR**

### **Cyclin B1 scaffolds MAD1 at the kinetochore corona to activate the mitotic checkpoint**

Lindsey A Allan<sup>1</sup>, Magda Reis<sup>1</sup>, Giuseppe Ciossani<sup>2</sup>, Pim J Huis in 't Veld<sup>2</sup>, Sabine Wohlgemuth<sup>2</sup>, Geert JPL Kops<sup>3</sup>, Andrea Musacchio<sup>2</sup> and Adrian T Saurin<sup>1</sup>

#### CONTENTS:

- APPENDIX FIGURE S1
- APPENDIX FIGURE S1 LEGEND

**A**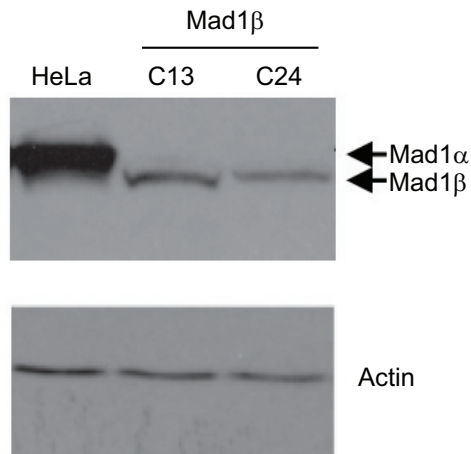**B**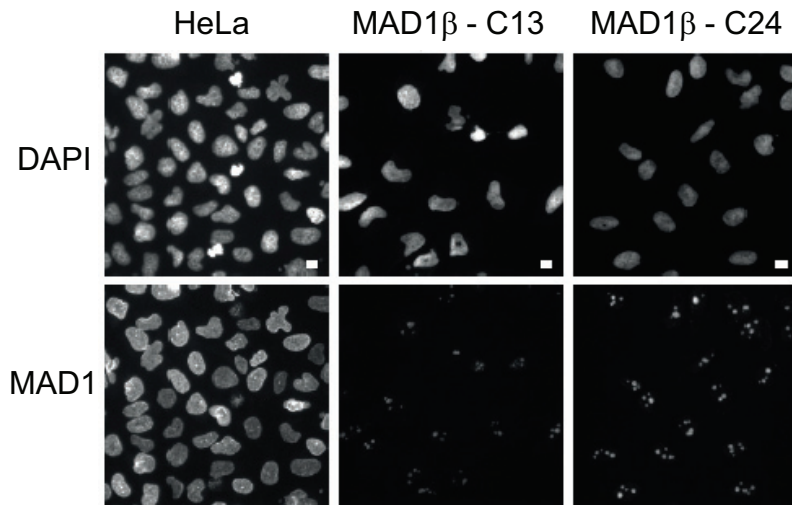

**Figure S1. Validation of Mad1 $\alpha$  knockout cell clones. A,B.** Western blot (A) and immunofluorescence images (B) of MAD1 in control on MAD1 $\alpha$  knockout HeLa cells (2 clones: MAD1 $\alpha$ -C13 and C24). The lack of nuclear staining demonstrates a MAD1 $\alpha$  knockout because MAD1 $\beta$  lacks a key NLS and is therefore cytoplasmic (Sze et al, 2008). Note, the cytoplasmic signal is not visible because immunofluorescence was performed on cells that were pre-extracted in 0.1% triton buffer (see methods).
